# Supplementary material for: Facile synthesis of bacterial cellulose fibres covalently intercalated with graphene oxide by one-step cross-linking for robust supercapacitors
Source: Royal Society of Chemistry journal article supplement (doi:10.1039/c4tc01822b), 2014-11-24
Supplement: c4tc01822b1.pdf [file c4tc01822b1.pdf]

## Supporting information

### **A facile synthesis of bacterial cellulose fibers covalently intercalated graphene oxide by one-step cross-linking for robust supercapacitors**

Yun Liu, Jie Zhou, Enwei Zhu, Jian Tang, Xiaoheng Liu, Weihua Tang\*

*Key Laboratory of Soft Chemistry and Functional Materials, Ministry of Education,  
Nanjing University of Science and Technology, Nanjing 210094, People's Republic of  
China*

Fax: (86) 25 84317311; Tel: (86) 25 84317311; E-mail: [whtang@mail.njust.edu.cn](mailto:whtang@mail.njust.edu.cn)

For element analysis using X-ray fluorescence (XFR) technique, BC/GO (100 mg) or BC/GO<sub>PM</sub> (100 mg) was blended with SiO<sub>2</sub> (6900 mg) for testing. The results are shown as Figure S1 and S2.

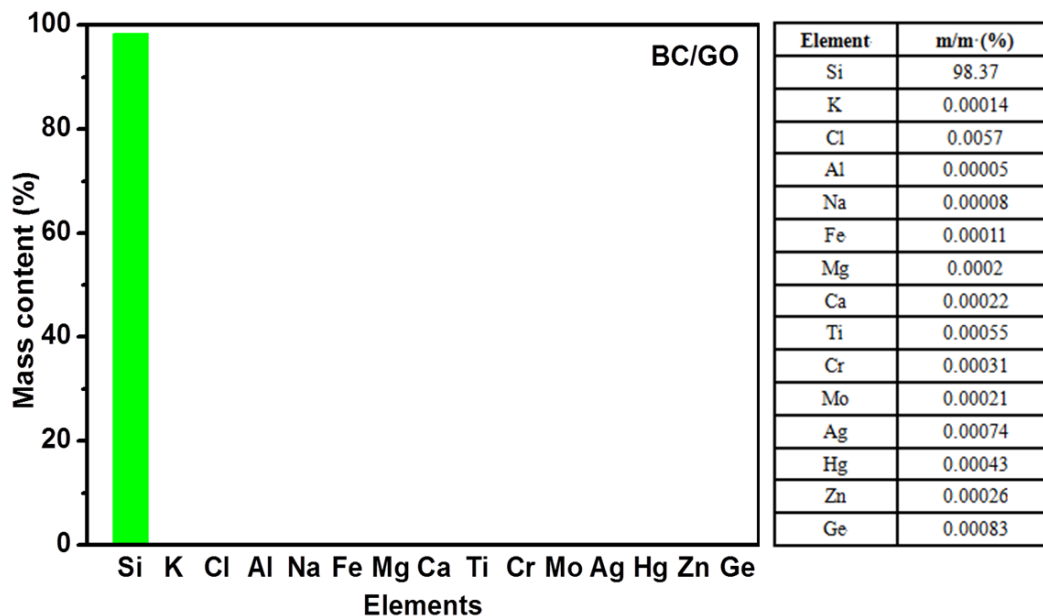

Figure S1. XRF element analysis of BC/GO.

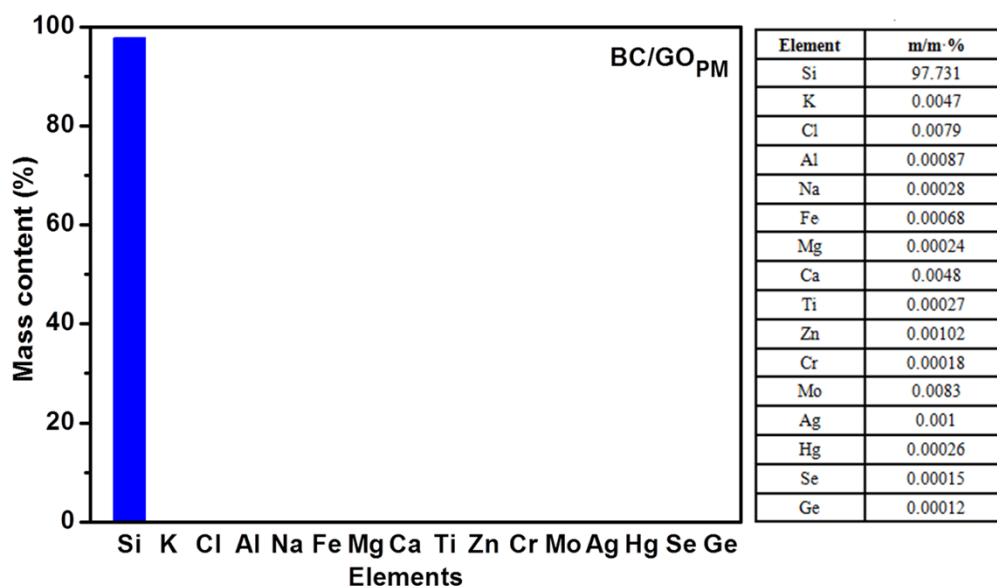

Figure S2. XRF element analysis of BC/GO<sub>PM</sub>.

The CHN elemental analysis was carried out on a vario EL III element analyzer (Elementar Analysensysteme GmbH, Germany), with the results for BC/GO (100 mg) or BC/GO<sub>PM</sub> summarized in Table S1.

**Table S1.** Chemical composition of BC/GO and BC/GO<sub>PM</sub> nanocomposites

| Sample              | Elements (atomic %) |      |       | Content (%) |      |
|---------------------|---------------------|------|-------|-------------|------|
|                     | C                   | H    | O     | BC          | GO   |
| BC                  | 44.45               | 6.22 | 49.33 | 100         |      |
| BC/GO               | 52.18               | 5.41 | 42.41 | 84.4        | 15.6 |
| BC/GO <sub>PM</sub> | 49.44               | 5.71 | 44.84 | 89.9        | 10.1 |
